# 1 No supergene despite social polymorphism in the big- 2 headed ant *Pheidole pallidula*

## 3 Authors

4 Emeline Favreau<sup>1\*</sup>, Claude Lebas<sup>2</sup>, Eckart Stolle<sup>3</sup>, Anurag Priyam<sup>1</sup>, Rodrigo Pracana<sup>1</sup>,  
5 Serge Aron<sup>4</sup>, Yannick Wurm<sup>1</sup>

6 \* Corresponding author

7 <sup>1</sup> Organismal Biology Department, School of Biological and Chemical Sciences, Queen  
8 Mary University of London, Mile End Road, London, E1 4NS, United Kingdom

9 <sup>2</sup> Association Roussillonnaise d'Entomologie, France

10 <sup>3</sup> Center of Molecular Biodiversity Research, Zoological Research Museum Alexander  
11 Koenig, Leibniz Institute for the Analysis of Biodiversity Change (LIB), Adenauerallee  
12 127, 53113 Bonn, Germany

13 <sup>4</sup> Service Evolution Biologique & Ecologie, Université Libre de Bruxelles, Bruxelles,  
14 Belgium

15 Corresponding author:

16 Emeline Favreau [emeline.a.favreau@gmail.com](mailto:emeline.a.favreau@gmail.com)

## 17 Abstract

18 Ant colonies ancestrally contained one queen and her non-reproductive workers. This is  
19 also the case for many but not all colonies of the Mediterranean big-headed ant *Pheidole*  
20 *pallidula*. Indeed, this species also has a derived form of social organization with multiple  
21 reproductive queens in the colony. The co-existence of two social forms also independently  
22 evolved in three other lineages of ants. In each of those lineages, variants of a supergene  
23 region of suppressed recombination determine social form. This is likely because  
24 supergene regions can link advantageous combinations of alleles from multiple loci. We  
25 thus hypothesized that a supergene region also determines colony queen number in the  
26 big-headed ant. To test this, we performed extensive population genetic analyses and  
27 genomic comparisons. We find no evidence of a supergene-like region with differentiation  
28 between single- and multiple-queen colonies. Our results show that a complex social  
29 polymorphism can evolve and be maintained without supergenes.

## 30 Introduction

31 Many species include individuals with alternate discrete phenotypes that co-exist within the  
32 same population. This variation can be controlled genetically (polymorphism), or can occur  
33 in response to environmental conditions (polyphenism). The existence of complex

34 polymorphisms and polyphenisms has long presented a conundrum for evolutionary  
35 biologists (Mayr 1963; Stearns 2010). Indeed, gene flow can cause alleles that benefit  
36 individuals with one phenotype to be carried by individuals of an alternative phenotype,  
37 where these alleles can be maladaptive. Several resolutions exist to this type of  
38 evolutionary antagonism. One that has been extensively discussed is the evolution of  
39 supergene regions of suppressed recombination (Stearns 2010; Thompson and Jiggins  
40 2014; Gutiérrez-Valencia et al. 2021). Supergene regions emerge when the alleles  
41 contributing to a given phenotype become linked, for instance through the inversion of part  
42 of a chromosome. Supergenes allow linked alleles to be inherited as a unit and to be  
43 shielded from alleles that contribute to the alternate trait (Kirkpatrick and Barton 2006).  
44 High-throughput sequencing has enabled genome-wide comparisons between morphs in  
45 many species and thus led to the discovery of many examples of supergenes (e.g., S-locus  
46 in *Primula* heterostyly (Huu et al. 2016), P-locus in *Heliconius* Batesian mimicry (Joron et al.  
47 2006; see review by Gutiérrez-Valencia et al. 2021). However, we still know little about how  
48 supergenes emerge, or whether they can arise from non-genetic polyphenisms.

49 Ants are excellent models for studying the evolution of complex phenotypes. They  
50 ancestrally have one queen per colony, yet many ant species have transitioned to having  
51 exclusively multiple-queen colonies (Hughes et al. 2008), and some species include both  
52 single- and multiple-queen colonies (Boulay et al. 2014). Differences between social forms  
53 are best-known in the red fire ant *Solenopsis invicta*. In this species, queens in single-  
54 queen colonies have larger abdomens, and workers are more aggressive than in multiple-  
55 queen colonies. Furthermore, young queens from single-queen colonies fly far from their  
56 original nest for mating, then independently found new colonies. In contrast, queens  
57 forming multiple-queen colonies rejoin their original nest after mating closeby, and a new  
58 multiple-queen colony forms when a group of queens and workers leave on foot. In  
59 *S. invicta* and other species, the multiple-queen social form is favored when dispersal risks  
60 are high and independent colony founding success is low (Hölldobler and Wilson 1990;  
61 Ross and Keller 1995).

62 Genetic comparisons between single- and multiple-queen colonies have been  
63 performed in three lineages of ants that are only distantly related, with most recent common  
64 ancestry between any pair of lineages being 119 million years ago (Blanchard and Moreau  
65 2017). In all cases, social organization is controlled by supergene regions of suppressed  
66 recombination. The supergene regions evolved independently in each lineage and share no  
67 homology. The three supergene regions each include hundreds of genes; they span 8  
68 megabases (Mb) in *Pogonomyrmex californicus* (Errbii et al. 2021), 9 Mb in *Formica selysi*

69 (Purcell et al. 2014), and at least 20 Mb in *S. invicta* (Stolle et al. 2022). Sequence and  
70 gene expression differences between the two supergene variants of *S. invicta* (Pracana et  
71 al. 2017; Martinez-Ruiz et al. 2020; Stolle et al. 2022) are consistent with the theory that  
72 supergene architecture evolves to protect specific combinations of alleles from  
73 recombination (Kirkpatrick and Barton 2006; Thompson and Jiggins 2014; Rubenstein et al.  
74 2019).

75 Finding that supergenes encode social polymorphism in each of the three ant  
76 lineages suggests that this genetic architecture is required for the evolution or maintenance  
77 of social polymorphism. However, the lack of homology between the supergene regions  
78 also suggests that multiple molecular pathways exist for encoding social polymorphism.

79 To understand whether the co-existence of single- and multiple-queen colonies  
80 requires a supergene region, we explored the genetic basis of variation in social  
81 organization in the Mediterranean big-headed ant *Pheidole pallidula*. This species is a  
82 distant relative to the other examined ant lineages, its most recent common ancestry being  
83 51 million years ago with *Solenopsis* (Kumar et al. 2017). In the big-headed ant, single-  
84 queen and multiple-queen colonies co-exist in the same geographic areas (Aron et al.  
85 1999). The two social forms differ in mating and dispersal strategies similarly to what occurs  
86 in *S. invicta* (Fournier et al. 2016). We generated population genomics data from the big-  
87 headed ant and used two types of analysis to test whether any segment of its genome  
88 shows the types of patterns that would be expected if a supergene controlled social form:  
89 we looked for signs of allelic differentiation and for signs of differences in genome  
90 coverage. We found population-specific differences in allele frequencies between social  
91 forms, but intriguingly no evidence of a supergene. Our results show that supergene  
92 architecture is not required for alternate social phenotypes, and highlights the types of allele  
93 frequency differences that could precede supergene evolution.

## 94 Results

### 95 **Paucity of consistent genotype differences between single- and multiple-queen** 96 **colonies**

97 To determine whether a supergene contributes to social polymorphism in *P. pallidula*, we  
98 collected workers from 108 colonies across three populations: Bruniquel (Southern France),  
99 Vigliano (Central Italy) and Iberia (Spain) (Figure 1a, Supplementary Figure 1). We  
100 determined the social form of each colony by genotyping six polymorphic microsatellite loci  
101 on at least 8 workers per colony (Supplementary Table 2). Both social forms were present

102 in each population, with 37 single-queen and 71 multiple-queen colonies overall  
103 (Supplementary Table 3). To enable genome-wide comparisons, we first constructed a  
104 long-read *de novo* genome assembly for this species (N50 length: 588 kb; total length:  
105 287 Mb; BUSCO completeness: 98.8%; Supplementary Information, Supplementary Figure  
106 2, Supplementary Tables 1 and 8). We subsequently sequenced the genome of one worker  
107 per colony using pairs of 150 bp reads (Supplementary Table 9), obtaining 1,300× genome  
108 coverage overall. From these data we identified 812,760 high-confidence Single Nucleotide  
109 Polymorphisms (SNPs; Supplementary Table 4).

110 We performed four complementary lines of analyses of these SNPs to find evidence  
111 of allelic differentiation between individuals from single-queen and from multiple-queen  
112 colonies. If a supergene region were associated with social form, we would expect many  
113 closely-linked loci to be consistently differentiated between colony types and across the  
114 three populations. Our approach was guided by simulations of populations carrying  
115 supergene loci of *S. invicta* and of *F. selysi*. These simulations showed that our approach  
116 and the amount of genetic variation in our dataset should be sufficient to detect a potential  
117 supergene (Supplementary Information, Supplementary Figures 12, 13, 14 and 15).

118 We first performed principal component analysis of all retained SNPs. This shows  
119 that the first two principal components, which each explain less than 4% of the genetic  
120 variation in our dataset, separate samples by geographical region (Figure 1b). Similarly,  
121 none of the first 12 principal components show a clear association with social form  
122 (Supplementary Figure 5), suggesting that no large set of SNPs are systematically  
123 associated with social form.

124 We subsequently performed a genome-wide comparison between all individuals  
125 from single- and multiple-queen colonies. For this, we initially subset our dataset to the  
126 121,786 SNPs that were polymorphic in all three populations and that had been genotyped  
127 in at least 75% of the samples. This subset includes a variant every 2,463 bp, a sufficient  
128 density to identify the smallest known supergenes, such as the stickleback fish supergene  
129 (200 kbp; Erickson et al. 2018) or the *Primula S* locus (300 kbp; Li et al. 2016). Forty-eight  
130 SNPs were significantly associated with social form (Fisher's exact test  $P_{adj} < 0.05$ ,  
131 Bonferroni correction, Figure 1c). However, these SNPs did not show the characteristics  
132 expected if they were located within a supergene: the significant SNPs were scattered  
133 across the genome; no particular genomic regions were overrepresented (Supplementary  
134 Figure 6, Supplementary Tables 5 and 6). Analogous comparisons between single- and  
135 multiple-queen colonies using all variable SNPs or all Bruniquel SNPs yielded qualitatively  
136 similar results (Supplementary Information, Supplementary Figures 7, 8 and 9).

137 Third, we hypothesized that a potential supergene may be detectable only within one  
138 population because of supergene turnover or population-specific genetic variation, such as  
139 drift or recent local adaptation (Shi et al. 2020). To test whether we could detect population-  
140 specific evidence of a supergene, we performed an additional population-specific genome-  
141 wide comparison for each of our three populations. We found significant associations  
142 between SNPs and social form in the Bruniquel population only (20 SNPs, Fisher's exact  
143 test  $P_{adj} < 0.05$ , Bonferroni correction, Supplementary Figures 8 and 9). However, these  
144 SNPs were scattered across the genome, and only three of them were also variable in the  
145 other populations. Furthermore, the regions surrounding significant loci showed no trend for  
146 association with social form in the other datasets (Figure 1f, Supplementary Figure 10).  
147 Finally, we calculated the fixation index  $F_{ST}$  to test whether there is genetic differentiation  
148 between social forms within each population. Between *Solenopsis* siblings carrying  
149 alternate supergene variants, the average  $F_{ST}$  in the supergene region is 0.9, while between  
150 *Formica* colonies with alternate social forms,  $F_{ST}$  is in some species as high as 0.8 within  
151 the supergene region, and in any case at least 2-fold higher than the genome average  
152 (Pracana et al. 2017; Brelsford et al. 2020). We found that the genome-wide  $F_{ST}$  between  
153 social forms was consistently low within each *Pheidole* population ( $F_{ST} < 0.25$  in each  
154 analysis with 30 kb window sizes), with only few isolated population-specific regions of  $F_{ST}$   
155 peaks that deviated from the genome-wide distribution (Figure 1e). Thus potential genetic  
156 differences between social forms are weak and population-specific.

### 157 **Lack of coverage differences between single- and multiple-queen colonies**

158 We hypothesized that if a supergene truly controls social form in *Pheidole*, the absence of  
159 signal in the previous analyses could be due to differences in the ability to map DNA  
160 sequence reads from the supergene to the reference genome. Two reasons could explain  
161 this. First, the supergene variant associated with multiple-queen colonies could be so  
162 divergent from the reference genome haplotype that read alignment and subsequent SNP  
163 identification becomes impossible with standard bioinformatic tools. Such divergence is  
164 analogous to the divergence between some sex chromosomes; indeed, some sex  
165 chromosomes can be identified as regions with low coverage in the heterogametic sex  
166 (Carey et al. 2022). Alternatively, social form could be controlled by a hemizygous  
167 supergene that is present in multiple-queen colonies but absent from single-queen colonies.  
168 This would make it comparable to the supergene controlling heterostyly in *Primula*  
169 primroses, with a hemizygous insertions present exclusively in one of the two morphs (Li et

170 al. 2016). Creating a genome reference from each morph can enable the recovery of these  
171 types of supergenes (Vekemans et al. 2021).

172 We used three approaches to test whether the samples taken from multiple-queen  
173 colonies included sequences that are absent from the single-queen reference assembly  
174 (Supplementary Figure 11a). First, we produced *de novo* assemblies from reads that did  
175 not map to the single-queen reference assembly. The resulting contigs were all short and  
176 are likely to represent standard copy-number variation (Supplementary Table 7 and 10).  
177 Second, we identified contigs with extreme high coverage of reads either from single-queen  
178 colonies (top part of Figure 2) or from multiple-queen colonies (bottom part of Figure 2), to  
179 test whether the single-queen reference assembly may include duplicated segments such  
180 as pseudogenes associated with social form. We found that such contigs are short (median  
181 length of 1,986 bp) and carry none of the 48 SNPs significantly associated with social form  
182 in all populations. Third, we calculated for each sample the proportions of reads that map to  
183 the single-queen reference assembly, to determine if there may be loci present in many  
184 individuals that are absent from our reference. We found no systematic difference in  
185 mapped read proportions between social forms nor GC content (Supplementary Figures 3  
186 and 4). In sum, none of these additional analyses suggested that a supergene region is  
187 associated with social form in this species.

## 188 Discussion

189 The Mediterranean big-headed ant *Pheidole pallidula* is a socially polymorphic species in  
190 which some colonies have the ancestral social form with a single queen, while other  
191 colonies have a derived social form with multiple queens. To test whether a supergene  
192 region determines social form in this species, we performed genome-wide comparisons  
193 across 108 colonies. We found some genetically differentiated loci between single-queen  
194 and multiple-queen colonies, but these loci are spread throughout the genome, with no  
195 evidence that they are linked together to form a supergene. These findings indicate that an  
196 alternate mechanism determines whether a colony of the big-headed ant will have one or  
197 multiple queens.

198 Our results suggest that social form in this species has an environmental and a  
199 genetic component. Ecological work has identified environmental conditions in which  
200 multiple-queen colonies are favored. In particular, intense competition over space and food  
201 resources can change population structure (Sundstrom 1995), and is associated with



202 multiple-queen colonies (Herbers 1986; Boomsma et al. 2014), polydomal colonies (Burns  
203 et al. 2019), and supercoloniality (Helanterä 2022). Some species may have more plasticity  
204 in social form than others in responding to competition. Our finding alleles associated with  
205 social form highlights which types of changes may facilitate this plasticity, for example by  
206 increasing the likelihood of a newly mated queen to join an established colony, or lowering  
207 worker aggression.

208 We found species-specific and population-specific associations between genotype  
209 and social form, which indicates that social form may have a genetic component in  
210 *P. pallidula*. Some of these loci may have stood out in our analysis due to genetic  
211 differentiation that is neutral, linked to demography, or otherwise unrelated to social form.

212 Nevertheless, the existence of alleles associated with social form in this species has  
213 an important implication for understanding the early steps in supergene evolution. Alleles at  
214 some of these loci could increase the likelihood that a colony accepts multiple queens,  
215 while alleles at other loci could increase survival of multiple-queen colonies. In this  
216 situation, if allelic effects are strong enough, selection could favor locking the best allelic  
217 combinations together. This could, for example, occur through a chromosomal inversion  
218 event and would represent a hallmark in supergene evolution (Kirkpatrick and Barton 2006;  
219 Thompson and Jiggins 2014). Further studies of other *Pheidole* populations or species may  
220 thus show patterns that differ from ours.

221 Overall, our study suggests that the evolution and maintenance of social  
222 polymorphism can occur without a supergene. Further work, ideally combining long-term  
223 field observation, cross-breeding experiments and multi-generational analyses, will produce  
224 a more extensive survey of the potential mechanisms at play in *P. pallidula*, and, ultimately,  
225 of the evolution of social organization in the ants.

## 226 Data availability

227 Raw reads and analysed data for both the short reads and long reads are available at NCBI  
228 PRJNA721572 and PRJNA729742. All other data supporting the findings of this study are  
229 available within the paper and its supplementary files (Supplementary Tables,  
230 Supplementary Information), and at <https://wurmlab.com/data>. All scripts are available on  
231 Github at [https://github.com/EmelineFavreau/Pheidole\\_pallidula\\_social\\_polymorphism](https://github.com/EmelineFavreau/Pheidole_pallidula_social_polymorphism).

## 232 Acknowledgements

233 We thank Xavier Espalader, Nilo Ortiz de Zugasti Carron, Pedro Lorite Martínez, Janine  
234 Remoué and Carlos Martinez Ruiz for assisting in the sampling effort; Richard A. Nichols,  
235 Christophe Eizaguirre and Max Reuter for advice and discussion. This work was supported  
236 by the Natural Environment Research Council (grant NE/L002485/1 to E.F. and  
237 NE/L00626X/1 to Y.W.) and the Biotechnology and Biological Sciences Research Council  
238 (grant BB/K004204/1 to Y.W.). This research utilised Queen Mary's Apocrita HPC facility,  
239 supported by QMUL Research-IT.

## 240 Author contributions

241 E.F. contributed to the study design, data collection, laboratory experiments, data analysis,  
242 manuscript writing; C.L. contributed to data collection; E.S. contributed to laboratory  
243 experiments, manuscript writing; A.P. contributed to data analysis; R.P. contributed to the  
244 study design, manuscript writing; S.A. contributed to data collection; Y.W. contributed to the  
245 study design, data collection, manuscript writing.

## 246 Competing interests

247 The authors declare no competing interests.

## 248 References

- 249 Aron S, Campan E, Boomsma JJ, Passera L. 1999. Social structure and split sex ratios in  
250 the ant *Pheidole pallidula*. *Ethol Ecol Evol* 11:209–227.
- 251 Blanchard BD, Moreau CS. 2017. Defensive traits exhibit an evolutionary trade-off and  
252 drive diversification in ants. *Evolution (N Y)* 71:315–328.
- 253 Boomsma JJ, Huszár DB, Pedersen JS. 2014. The evolution of multiqueen breeding in  
254 eusocial lineages with permanent physically differentiated castes. *Anim Behav* 92:241–  
255 252.
- 256 Boulay R, Arnan X, Cerdá X, Retana J. 2014. The ecological benefits of larger colony size  
257 may promote polygyny in ants. *J Evol Biol* 27:2856–2863.
- 258 Brelsford A, Purcell J, Avril A, Tran Van P, Zhang J, Brütsch T, Sundström L, Helanterä H,  
259 Chapuisat M. 2020. An ancient and eroded social supergene is widespread across  
260 *Formica* ants. *Curr Biol* 30:304–311.e4.



- 261 Burns DDR, Pitchford JW, Parr CL, Franks DW, Robinson EJJ. 2019. The costs and  
262 benefits of decentralization and centralization of ant colonies. *Behavioral Ecology*  
263 30:1700–1706.
- 264 Carey SB, Lovell JT, Jenkins J, Leebens-Mack J, Schmutz J, Wilson MA, Harkess A. 2022.  
265 Representing sex chromosomes in genome assemblies. *Cell Genomics* 2:100132.
- 266 Erickson PA, Baek J, Hart JC, Cleves PA, Miller CT. 2018. Genetic Dissection of a  
267 Supergene Implicates *Tfap2a* in Craniofacial Evolution of Threespine Sticklebacks.  
268 *Genetics* 209:591–605.
- 269 Errbii M, Ernst UR, Lajmi A, Gadau J, Schrader L. 2021. Genomic architecture and  
270 evolutionary dynamics of a social niche polymorphism in the California harvester ant,  
271 *Pogonomyrmex californicus*. *bioRxiv*:2021.03.21.436260.
- 272 Fournier D, de Biseau J-C, de Laet S, Lenoir A, Passera L, Aron S. 2016. Social structure  
273 and genetic distance mediate nestmate recognition and aggressiveness in the  
274 facultative polygynous ant *Pheidole pallidula*. *PLoS One* 11:e0156440.
- 275 Gutiérrez-Valencia J, Hughes PW, Berdan EL, Slotte T. 2021. The genomic architecture  
276 and evolutionary fates of supergenes. *Genome Biol Evol* 13.
- 277 Helanterä H. 2022. Supercolonies of ants (Hymenoptera: Formicidae): ecological patterns,  
278 behavioural processes and their implications for social evolution. *Myrmecol News*:1–  
279 22.
- 280 Herbers JM. 1986. Nest site limitation and facultative polygyny in the ant *Leptothorax*  
281 *longispinosus*. *Behav Ecol Sociobiol* 19:115–122.
- 282 Hölldobler B, Wilson EO. 1990. The Ants. Cambridge, Mass.: Harvard University Press
- 283 Hughes WOH, Ratnieks FLW, Oldroyd BP. 2008. Multiple paternity or multiple queens: two  
284 routes to greater intracolony genetic diversity in the eusocial *Hymenoptera*. *J Evol Biol*  
285 21:1090–1095.
- 286 Huu CN, Kappel C, Keller B, Sicard A, Takebayashi Y, Breuninger H, Nowak MD, Baurle I,  
287 Himmelbach A, Burkart M, et al. 2016. Presence versus absence of *CYP734A50*  
288 underlies the style-length dimorphism in primroses. *Elife* 5.
- 289 Joron M, Papa R, Beltrán M, Chamberlain N, Mavárez J, Baxter S, Abanto M, Bermingham  
290 E, Humphray SJ, Rogers J, et al. 2006. A Conserved Supergene Locus Controls  
291 Colour Pattern Diversity in *Heliconius* Butterflies. *PLoS Biol* 4:e303.
- 292 Kirkpatrick M, Barton N. 2006. Chromosome inversions, local adaptation and speciation.  
293 *Genetics* 173:419–434.
- 294 Kumar S, Stecher G, Suleski M, Hedges SB. 2017. TimeTree: A Resource for Timelines,  
295 Timetrees, and Divergence Times. *Mol Biol Evol* 34:1812–1819.

- 296 Li J, Cocker JM, Wright J, Webster MA, McMullan M, Dyer S, Swarbreck D, Caccamo M,  
297 van Oosterhout C, Gilmartin PM. 2016. Genetic architecture and evolution of the S  
298 locus supergene in *Primula vulgaris*. *Nat Plants* 2.
- 299 Martinez-Ruiz C, Pracana R, Stolle E, Paris CI, Nichols RA, Wurm Y. 2020. Genomic  
300 architecture and evolutionary antagonism drive allelic expression bias in the social  
301 supergene of red fire ants. *Elife* 9.
- 302 Mayr E. 1963. *Animal species and evolution*. Cambridge: Belknap Press of Harvard  
303 University Press
- 304 Pracana R, Priyam A, Levantis I, Nichols RA, Wurm Y. 2017. The fire ant social  
305 chromosome supergene variant Sb shows low diversity but high divergence from SB.  
306 *Mol Ecol* 26:2864–2879.
- 307 Purcell J, Brelsford A, Wurm Y, Perrin N, Chapuisat M. 2014. Convergent genetic  
308 architecture underlies social organization in ants. *Curr Biol* [Internet] 24:2728–2732.  
309 Available from: <http://linkinghub.elsevier.com/retrieve/pii/S0960982214012676>
- 310 Ross KG, Keller L. 1995. Ecology and Evolution of Social Organization: Insights from Fire  
311 Ants and Other Highly Eusocial Insects. *Annu Rev Ecol Syst* 26:631–656.
- 312 Rubenstein DR, Ågren JA, Carbone Lucia and Elde NC, Hoekstra HE, Kapheim KM, Keller  
313 L, Moreau CS, Toth AL, Yeaman S, Hofmann HA. 2019. Coevolution of genome  
314 architecture and social behavior. *Trends Ecol. Evol.* 34:844–855.
- 315 Shi H, Burch KS, Johnson R, Freund MK, Kichaev G, Mancuso N, Manuel AM, Dong N,  
316 Pasaniuc B. 2020. Localizing components of shared transethnic genetic architecture of  
317 complex traits from GWAS summary data. *Am J Hum Genet* 106:805–817.
- 318 Stearns FW. 2010. One hundred years of pleiotropy: a retrospective. *Genetics* 186:767–  
319 773.
- 320 Stolle E, Pracana R, López-Osorio F, Priebe MK, Hernández GL, Castillo-Carrillo C, Arias  
321 MC, Paris CI, Bollazzi M, Priyam A, et al. 2022. Recurring adaptive introgression of a  
322 supergene variant that determines social organization. *Nat Commun* 13:1180.
- 323 Thompson MJ, Jiggins CD. 2014. Supergenes and their role in evolution. *Heredity (Edinb)*  
324 113:1–8.
- 325 Vekemans X, Castric V, Hipperson H, Müller NA, Westerdahl H, Cronk Q. 2021. Whole-  
326 genome sequencing and genome regions of special interest: Lessons from major  
327 histocompatibility complex, sex determination, and plant self-incompatibility. In:  
328 *Molecular Ecology*. Vol. 30. John Wiley and Sons Inc. p. 6072–6086.

## 329 Figure Legends

### 330 **Figure 1: No evidence that a supergene region is genetically differentiated between** 331 **single- and multiple-queen colonies.**

- 332 **a)** Experimental design: 108 sequenced workers, one per colony, originating from three  
333 populations containing both single-queen and multiple-queen colonies.
- 334 **b)** The first two principal components based on 121,786 polymorphic SNPs separate  
335 populations but not social forms.
- 336 **c)** Association tests across the whole dataset: out of 121,786 SNPs, 48 were significantly  
337 associated with social form (Fisher's exact tests, Bonferroni adjusted  $P < 0.05$ , above the  
338 blue dashed line). SNP color alternates by contig; the 2,514 contigs are ordered by length.
- 339 **d)** Distribution of Bonferroni-corrected  $P$  values for 121,786 Fisher's exact tests of  
340 association with social form. The significant associations (below 0.05, dashed line) are  
341 represented in dark grey.
- 342 **e)**  $F_{ST}$  between social forms within each population (sliding 30kb windows, or entire contig  
343 when smaller). The 2,514 contigs are ordered by length. There is no common region for  
344 which the three populations have a high  $F_{ST}$ . High  $F_{ST}$  in the shortest contigs is a likely  
345 artifact of greater noise.
- 346 **f)** The contigs with the strongest genetic differentiation between social forms in one  
347 population are not the most differentiated in the other population (Pearson's correlation  $r =$   
348 0.443). 1,748 contigs containing SNPs within each population are represented by the most  
349 significant  $P$  value from each population (Fisher's exact test on SNP data, raw  $P$  value).  
350 The two green contigs contain SNPs that are significantly associated with social  
351 organization in the Bruniquel population.

### 352 353 **Figure 2: Relative sequencing coverage of reads from the two social forms for each** 354 **contig of the reference genome.**

355 Contigs are ordered by length on the x axis. Contigs that are enriched in either single-  
356 queen colony reads (orange, top y axis) or multiple-queen colony reads (purple, bottom y  
357 axis) are very short (left x axis) and lack SNPs significantly associated with social form  
358 (triangles).

359

## Figures

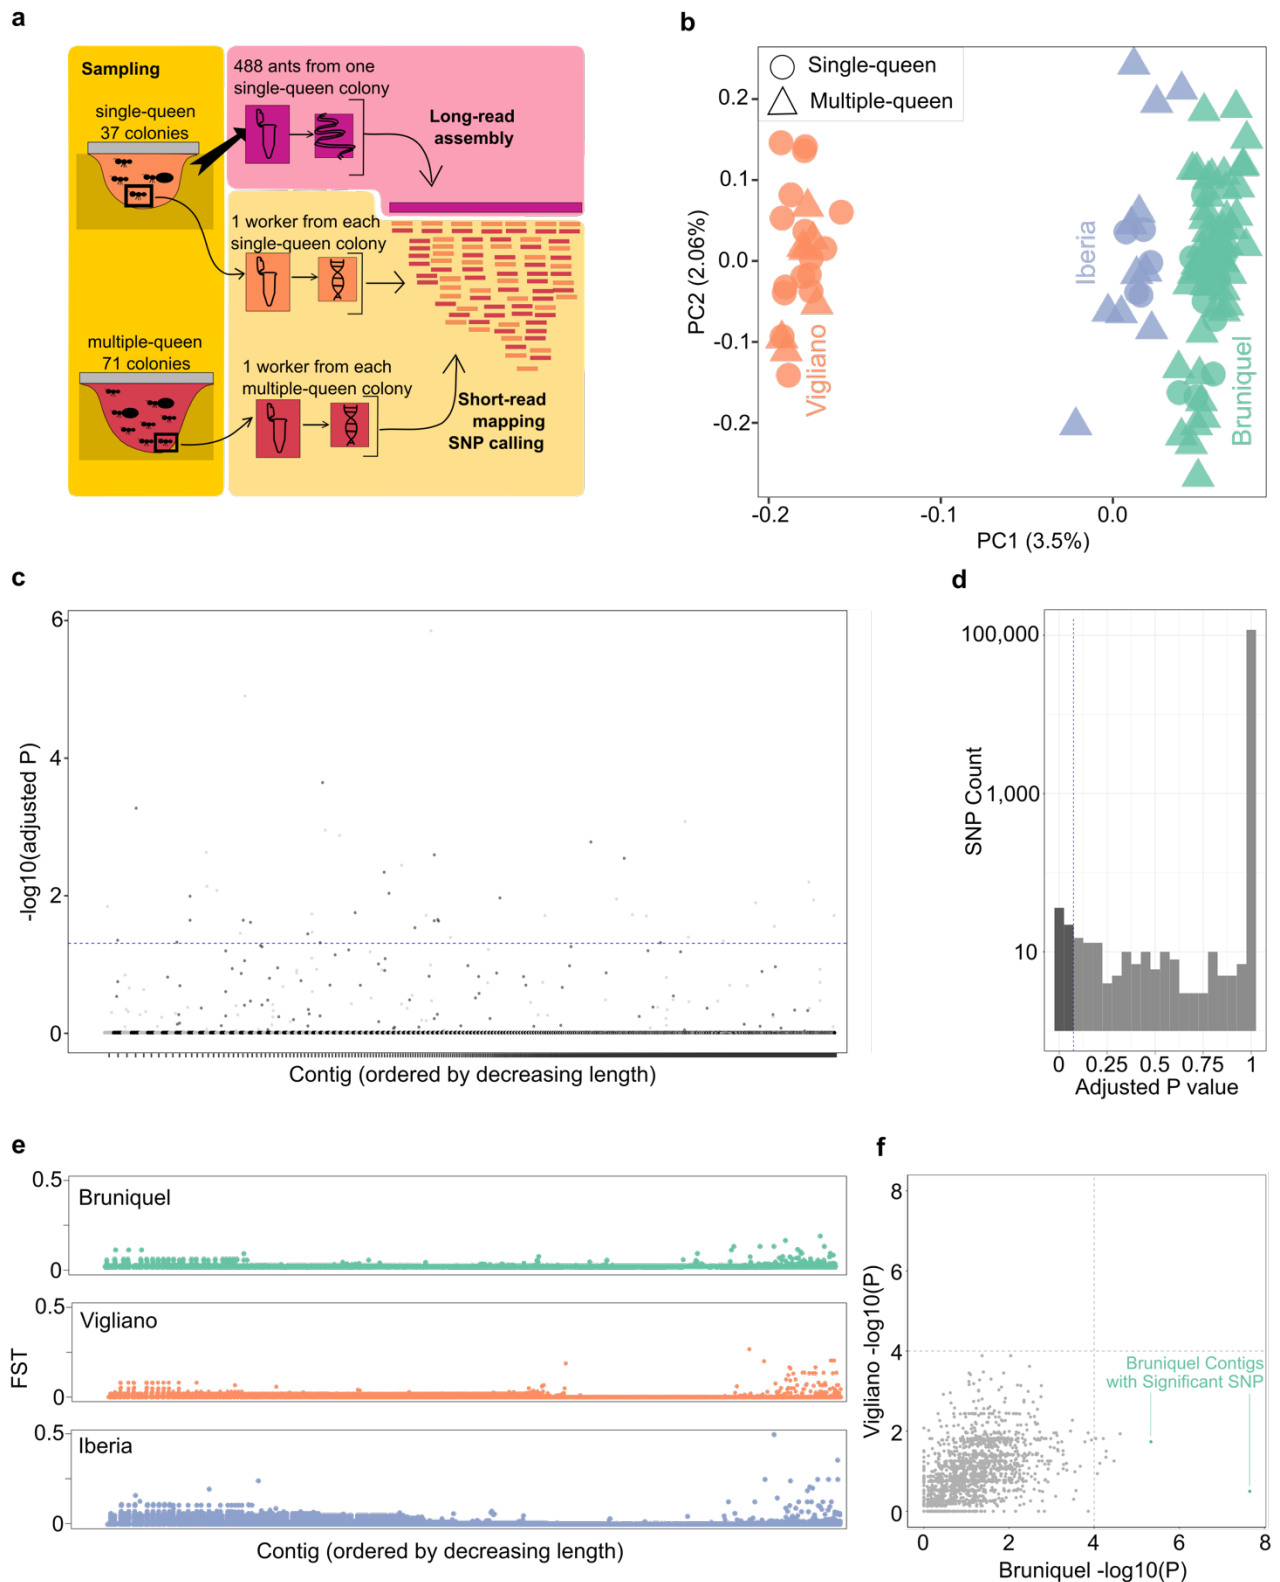

360

**Figure 1**

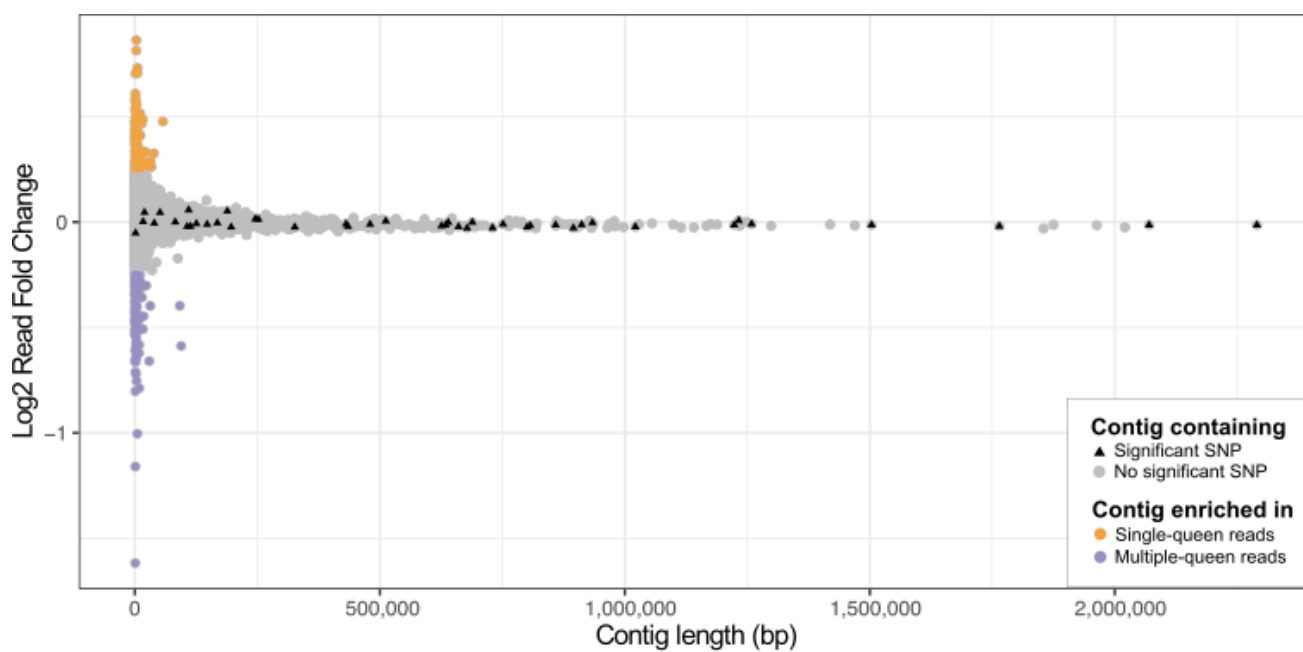

361 **Figure 2**
